# Supplementary material
Source: PubMed Central journal article supplement (PMC6549033)
Supplement: EMBR-20-e47227-s001.pdf [file EMBR-20-e47227-s001.pdf]

## Appendix

An alternatively transcribed TAZ variant negatively regulates JAK-STAT signaling  
Fang et al., 2019

### Table of Contents

| Appendix | Title                                                                       | Page  |
|----------|-----------------------------------------------------------------------------|-------|
| Fig S1   | The promoter, 5'UTR, and exon sequences of cTAZ                             | 2     |
| Fig S2   | cTAZ negatively regulated antiviral response                                | 3-4   |
| Fig S3   | YAP/TAZ could repress ISGs expression in a Hippo signaling-dependent manner | 5     |
| Fig S4   | cTAZ expression was induced by JAK-STAT signaling                           | 6     |
| Table S1 | Protein expression of cTAZ in different cell lines                          | 7     |
| Table S2 | mRNA expression of cTAZ in human tissues                                    | 8     |
| Table S3 | Antibodies used in this study                                               | 9     |
| Table S4 | Oligos used in this study                                                   | 10-11 |

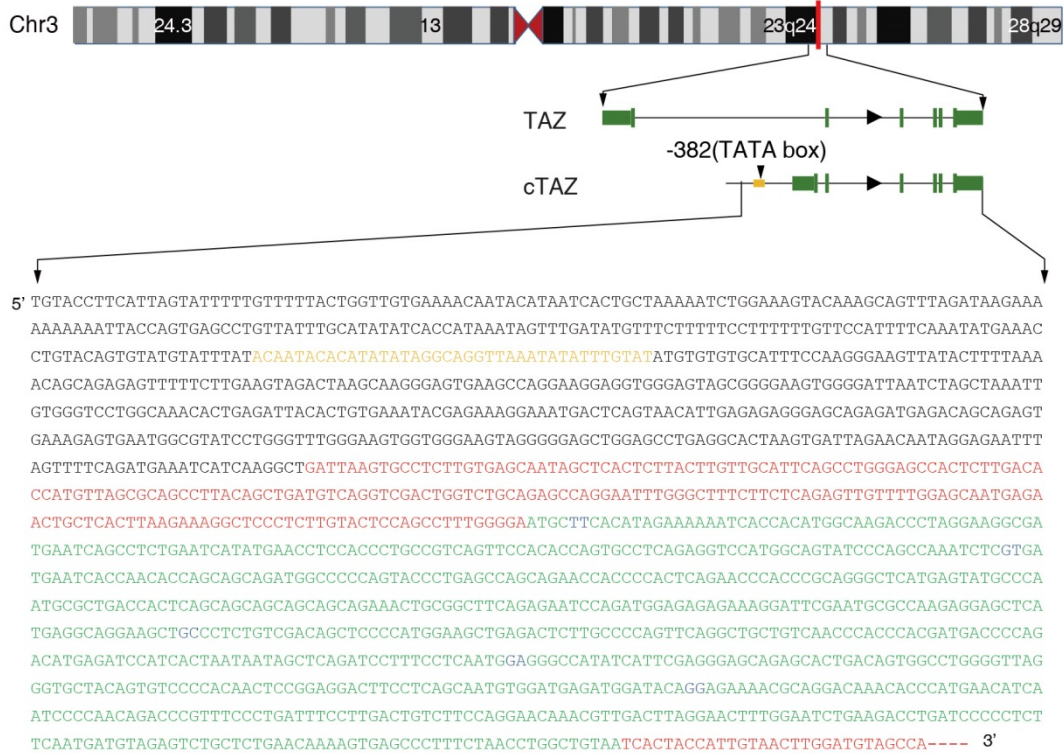

**Appendix Fig S1. The promoter, 5'UTR, and exon sequences of cTAZ.**

Proscan online tool was used for promoter and TATA box prediction (<https://wwwbimas.cit.nih.gov/molbio/proscan/>). The sequence in green indicates CDS, red for UTR, black for the predicated promoter, and yellow for the predicated TATA box.

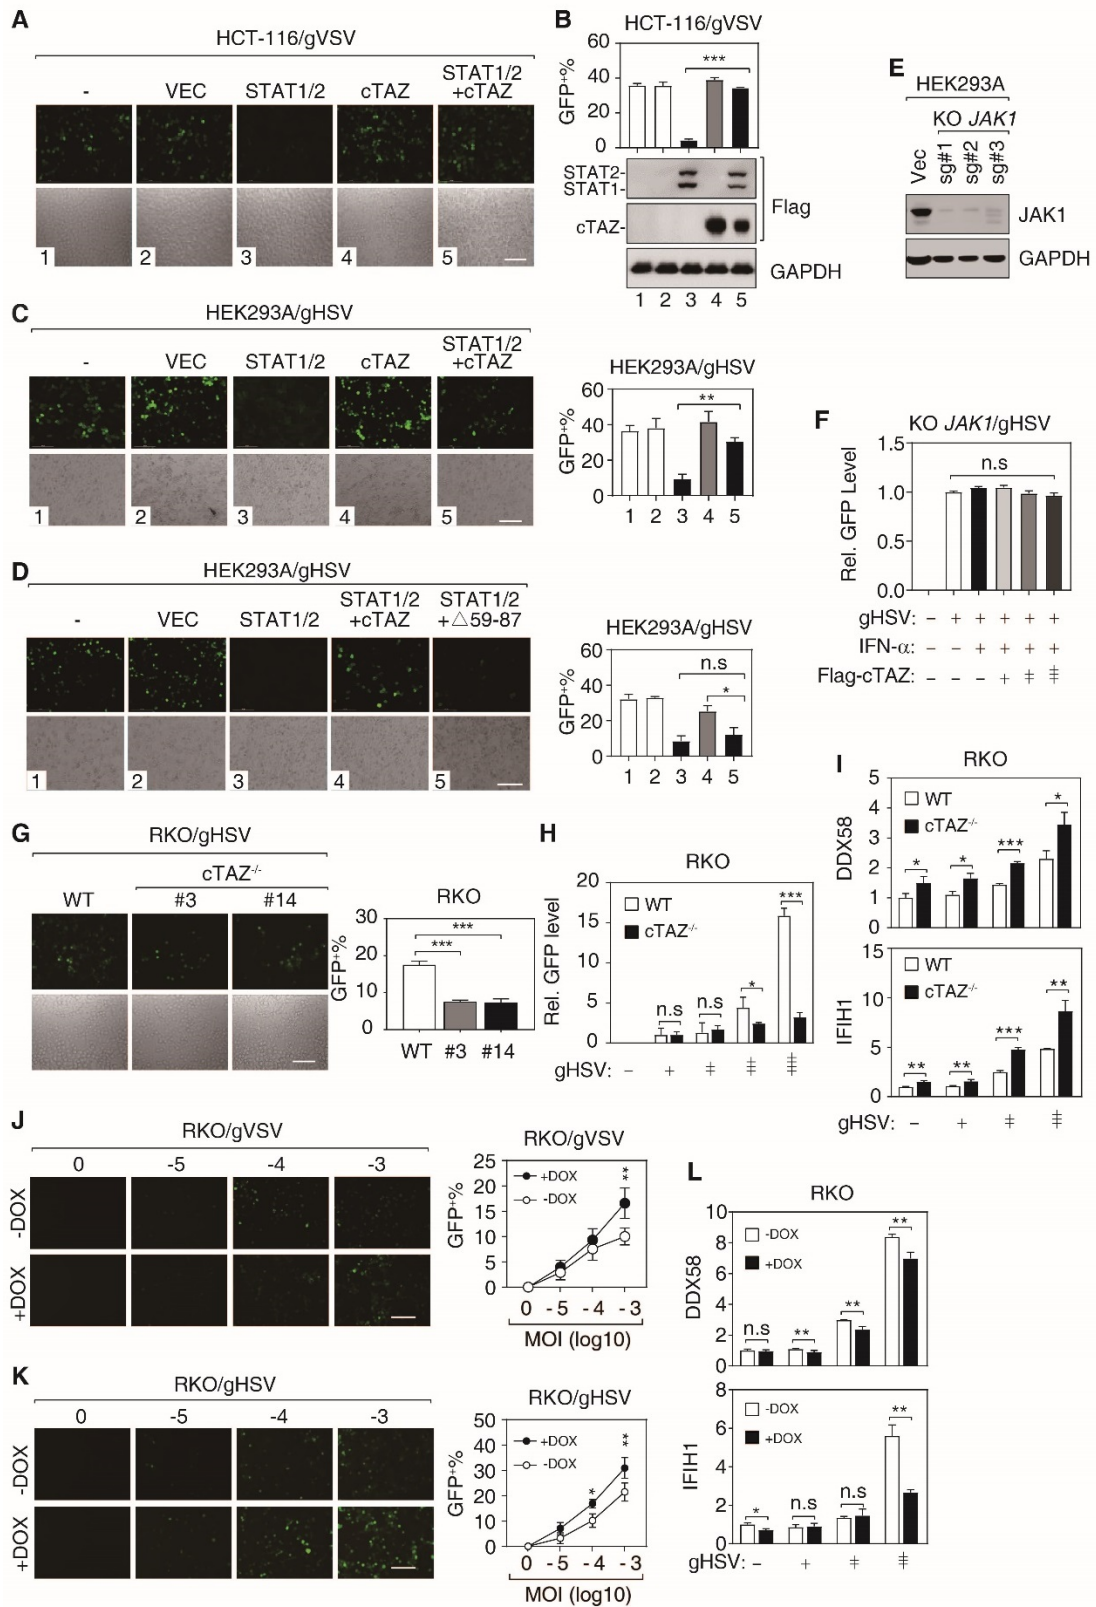

**Appendix Fig S2. cTAZ negatively regulated antiviral response.**

A. Overexpression of cTAZ repressed the antiviral activity of STAT1/2. HCT-116 cells were transfected with indicated plasmids and infected with gVSV (MOI = 0.01) for 12 hours. GFP signal indicated the infection of gVSV. Scale bar, 100  $\mu$ m.

B. Quantification of GFP positive cells in S2A. Protein levels were determined by IB.

C. cTAZ overexpression repressed cellular antiviral response. HEK293A cells were transfected with indicated plasmids and infected with gHSV (MOI = 0.01) for 12 hours. (Left) Viral infection was determined by green fluorescence. Scale bar, 100  $\mu$ m. (Right) Quantification of GFP positive cells.

D. Amino acids 59-87 deleted cTAZ did not affect cellular antiviral response. HEK293A cells were transfected with indicated plasmids. Virus infection and quantification of GFP positive cells were performed as in S2C. Scale bar, 100  $\mu$ m.

E. JAK1 deletion in HEK293A cells using CRISPR/cas9 technology. Three independent sgRNA were used.

F. cTAZ overexpression did not affect cellular antiviral activity in JAK1 KO cells. Transfection, infection and quantification were performed as in S2C.

G. cTAZ deficiency potentiated cellular antiviral activity. RKO cell lines (WT and two independent *cTAZ*<sup>-/-</sup> clones) were infected with gHSV (MOI = 0.1) for 12 hours. Scale bar, 100  $\mu$ m.

H. Deletion of cTAZ enhanced cellular antiviral activity. RKO cell lines (WT and #4 *cTAZ*<sup>-/-</sup>) were infected using gHSV for 12 hours, and fluorescence intensity in lysed cells was measured.

I. cTAZ deficiency promoted ISGs expression. Same cell lines and treatment were used as in S2H. mRNA levels of *DDX58* and *IFIH1* were measured by qPCR.

J and K. cTAZ overexpression enhanced cellular antiviral activity. DOX-inducible cTAZ-overexpressing cell lines were treated with or without DOX (1  $\mu$ g/ml) for 48 hours, and challenged with gVSV (J) or gHSV (K) for 24 hours, viral infection was determined by GFP intensity. Scale bar, 100  $\mu$ m.

L. cTAZ overexpression repressed ISGs expression. Same cell lines and treatments were used as in S2J. mRNA levels of *DDX58* and *IFIH1* were measured by qPCR.



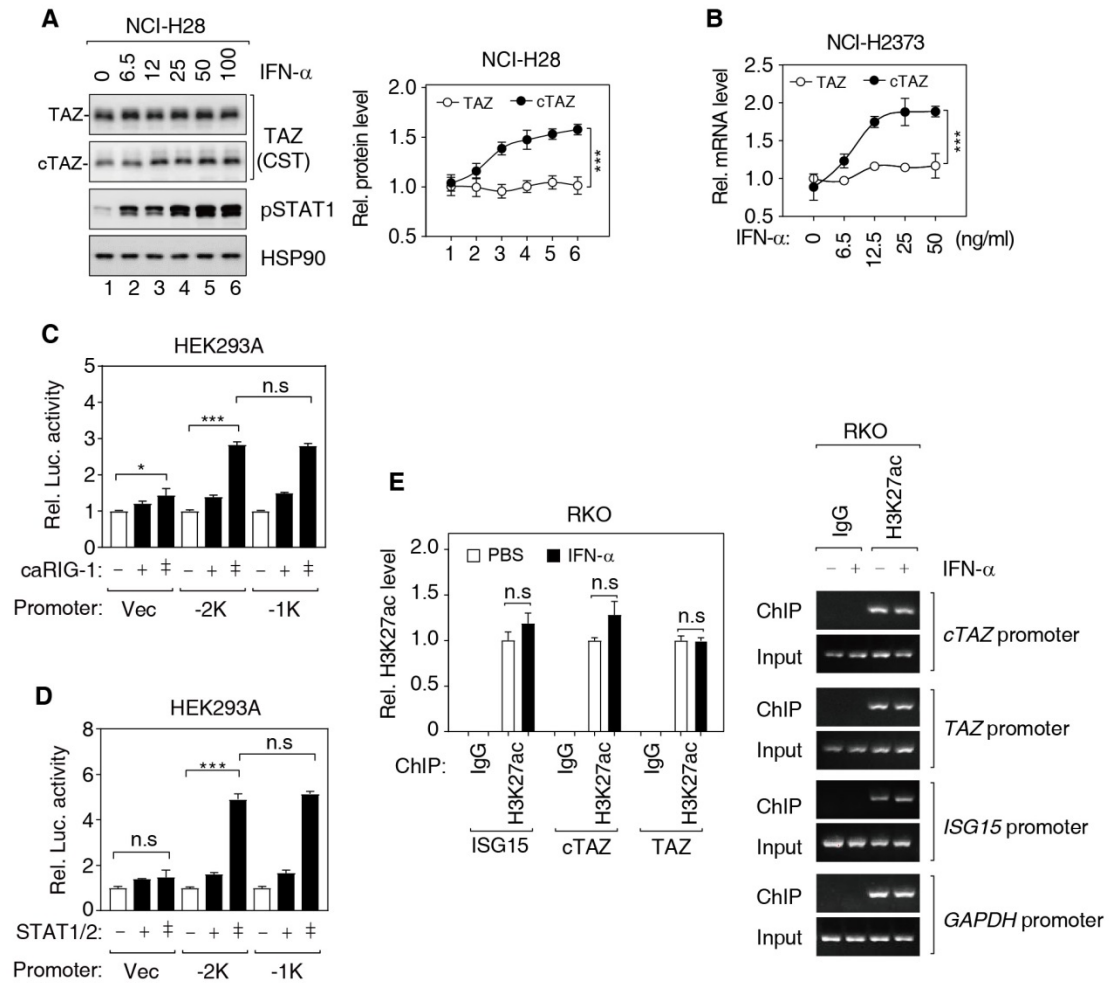

### Appendix Fig S4. cTAZ expression was induced by JAK-STAT signaling.

A. IFN- $\alpha$  induced the expression of cTAZ proteins. NCI-H28 cells were treated with IFN- $\alpha$  for 8 hours, and protein expression was determined by IB (Left). Quantification was performed using ImageJ software (Right). Two-way ANOVA was used for statistical analysis, n=3.

B. IFN- $\alpha$  induced the expression of cTAZ mRNA. NCI-H2373 cells were treated with IFN- $\alpha$  for 8 hours, mRNA levels of TAZ and cTAZ were determined by qPCR. Two-way ANOVA was used for statistical analysis, n=3.

C. Overexpression of caRIG-I activated cTAZ promoters. Luciferase reporters for 2K and 1K cTAZ promoters (2000 and 1000 bp upstream of translation starting site respectively) and caRIG-I were transfected into HEK293A cells, luciferase activity was measured 12 hours later.

D. Overexpression of STAT1/2 activated cTAZ promoters. As in S4C, except STAT1/2 was used instead of caRIG-I.

E. IFN- $\alpha$  could not modulate H3K27ac levels of cTAZ promoter. RKO cells were treated with or without IFN- $\alpha$  (50 ng/ml) for 1 hour and subjected to ChIP assays.

**Appendix Table S1. Protein expression of cTAZ in different cell lines.**

| <b>Cell type</b> | <b>cTAZ</b> |
|------------------|-------------|
| 293a             | ×           |
| MCF-7            | ×           |
| 92.1             | √           |
| NCI-H28          | √           |
| HUVEC            | √           |
| RKO              | √√          |
| ACHN             | √           |
| CaCO2            | √√          |
| HCT-15           | ×           |
| 293T             | ×           |
| MCF-10A          | ×           |
| NCI-H2373        | √           |
| NCI-H2452        | √           |
| NCI-H2052        | ×           |
| LS174T           | ×           |
| RCC4             | √           |
| HCT-116          | √           |
| MSTO-211H        | ×           |
| SW620            | ×           |
| HeLa             | ×           |
| MESO-12          | ×           |

**Appendix Table S2. mRNA expression of cTAZ in human tissues**

| <b>Tissue</b>   | <b>Count mean</b> | <b>Count max</b> | <b>Count median</b> | <b>Positive</b> | <b>Total</b> | <b>Positive %</b> |
|-----------------|-------------------|------------------|---------------------|-----------------|--------------|-------------------|
| Adipose_Tissue  | 3.92              | 15.19            | 2.91                | 213             | 515          | 41.36             |
| Adrenal_Gland   | 3.31              | 9.74             | 2.94                | 21              | 128          | 16.41             |
| Bladder         | 3.41              | 4.61             | 2.99                | 3               | 9            | 33.33             |
| Blood           | 2.67              | 20.58            | 1.69                | 38              | 444          | 8.56              |
| Blood_Vessel    | 3.85              | 17.20            | 2.78                | 220             | 606          | 36.3              |
| Bone_Marrow     | 3.17              | 6.72             | 3.07                | 27              | 70           | 38.57             |
| Brain           | 4.94              | 98.40            | 2.67                | 167             | 1152         | 14.5              |
| Breast          | 4.19              | 17.02            | 2.63                | 73              | 179          | 40.78             |
| Cervix_Uteri    | 2.38              | 2.62             | 2.34                | 5               | 10           | 50                |
| Colon           | 3.32              | 11.56            | 2.52                | 90              | 308          | 29.22             |
| Esophagus       | 4.04              | 25.15            | 3.14                | 214             | 653          | 32.77             |
| Fallopian_Tube  | 3.17              | 3.70             | 3.17                | 2               | 5            | 40                |
| Heart           | 4.21              | 21.19            | 3.09                | 123             | 377          | 32.63             |
| Kidney          | 4.28              | 7.67             | 3.59                | 4               | 28           | 14.29             |
| Liver           | 3.65              | 8.94             | 2.80                | 15              | 110          | 13.64             |
| Lung            | 5.25              | 77.95            | 2.90                | 129             | 288          | 44.79             |
| Muscle          | 4.24              | 22.36            | 3.18                | 40              | 396          | 10.1              |
| Nerve           | 3.68              | 12.03            | 2.69                | 129             | 278          | 46.4              |
| Ovary           | 4.51              | 20.76            | 3.47                | 51              | 88           | 57.95             |
| Pancreas        | 2.80              | 5.89             | 2.30                | 23              | 167          | 13.77             |
| Pituitary       | 3.29              | 11.56            | 2.36                | 34              | 107          | 31.78             |
| Prostate        | 3.33              | 11.79            | 2.52                | 38              | 100          | 38                |
| Salivary_Gland  | 4.68              | 12.11            | 3.35                | 21              | 55           | 38.18             |
| Skin            | 4.98              | 24.24            | 3.75                | 261             | 812          | 32.14             |
| Small_Intestine | 3.14              | 10.55            | 2.37                | 15              | 92           | 16.3              |
| Spleen          | 2.46              | 7.86             | 1.64                | 18              | 100          | 18                |
| Stomach         | 4.01              | 10.31            | 3.26                | 34              | 174          | 19.54             |
| Testis          | 5.55              | 42.88            | 4.16                | 40              | 165          | 24.24             |
| Thyroid         | 4.29              | 29.34            | 2.79                | 109             | 279          | 39.07             |
| Uterus          | 4.20              | 7.62             | 3.67                | 28              | 78           | 35.9              |
| Vagina          | 4.20              | 13.01            | 3.18                | 33              | 85           | 38.82             |
| total           |                   |                  |                     | 2218            | 7858         | 28.23             |

Positive: cTAZ (ENST00000472417) transcript count is more than one

Total: the total number of samples involved in this analysis

Positive %: the percentage of samples showing cTAZ expression

[https://toil.xenahubs.net/download/gtex\\_Kallisto\\_est\\_counts.gz](https://toil.xenahubs.net/download/gtex_Kallisto_est_counts.gz)

[https://toil.xenahubs.net/download/GTEX\\_phenotype.gz](https://toil.xenahubs.net/download/GTEX_phenotype.gz)



**Appendix Table 3. Antibodies used in this study**

| Antibody             | Company    | Catalog # | Source | Dilution factor |       |       |        |
|----------------------|------------|-----------|--------|-----------------|-------|-------|--------|
|                      |            |           |        | IB              | IP    | ChIP  | IF     |
| pYAP(S127)           | CST        | 13008S    | Rabbit | 1:1000          |       |       |        |
| TAZ(CST)             | CST        | 4883S     | Rabbit | 1:1000          | 1:500 |       |        |
| YAP/TAZ              | CST        | 8418S     | Rabbit | 1:1000          | 1:250 |       |        |
| anti-TAZ(SA)         | Sigma      | HPA007415 | Mouse  |                 | 1:500 |       |        |
| CTGF                 | Santa Cruz | sc-14939  | Goat   | 1:500           |       |       |        |
| CYR61                | Santa Cruz | sc-374129 | Mouse  | 1:500           |       |       |        |
| GAPDH                | Santa Cruz | sc-32233  | Mouse  | 1:5000          |       |       |        |
| Vinculin             | GeneTex    | GTX113294 | Rabbit | 1:5000          |       |       |        |
| HSP90                | BD         | 610418    | Mouse  | 1:5000          |       |       |        |
| GFP                  | GeneTex    | GTX113617 | Rabbit | 1:2000          |       |       |        |
| Flag(M2)             | Sigma      | F1804-1MG | Mouse  | 1:2000          | 1:500 |       | 1:250  |
| HA tag               | Santa Cruz | sc-7392   | Mouse  | 1:2000          |       |       |        |
| HA tag               | Santa Cruz | sc-805    | Rabbit |                 |       |       | 1:500  |
| E-cadherin           | BD         | 610182    | Mouse  | 1:1000          |       |       |        |
| N-cadherin           | BD         | 610920    | Mouse  | 1:1000          |       |       |        |
| Vimentin             | BD         | 550513    | Mouse  | 1:1000          |       |       |        |
| IRF3                 | Santa Cruz | sc-33641  | Mouse  | 1:500           |       |       |        |
| JAK1                 | Santa Cruz | sc-1677   | Mouse  | 1:500           |       |       |        |
| IRF7                 | Santa Cruz | sc-74471  | Mouse  | 1:500           |       |       |        |
| IRF9                 | Santa Cruz | sc-365893 | Mouse  | 1:500           |       |       |        |
| MX1                  | Santa Cruz | sc-166412 | Mouse  | 1:500           |       |       |        |
| RIG-I                | Santa Cruz | sc-376845 | Mouse  | 1:500           |       |       |        |
| H3K27ac              | Sigma      | 07-360-S  | Rabbit |                 |       | 1:500 |        |
| STAT1                | BD         | 610115    | Mouse  | 1:1000          | 1:500 | 1:500 | 1:200  |
| anti-STAT2           | BD         | 610187    | Mouse  | 1:1000          |       |       |        |
| pSTAT5Y694           | CST        | 4322      | Rabbit | 1:1000          |       |       |        |
| pSTAT3Y705           | CST        | 9145      | Rabbit | 1:1000          |       |       |        |
| pSTAT3S727           | CST        | 9134      | Rabbit | 1:1000          |       |       |        |
| pSTAT1Y701           | CST        | 7649      | Rabbit | 1:1000          |       |       |        |
| $\alpha$ -Mouse IgG  | MRB        | MR-M100   | Goat   | 1:2000          |       |       |        |
| $\alpha$ -Rabbit IgG | MRB        | MR-R100   | Goat   | 1:2000          |       |       |        |
| AlexFluor 555        | Invitogen  | A21428    | Goat   |                 |       |       | 1:1000 |
| AlexFluor 488        | Invitogen  | A11001    | Goat   |                 |       |       | 1:1000 |

CST: Cell Signaling Technology;

BD: BD Biosciences;

Santa Cruz: Santa Cruz Biotechnology;

Sigma: Sigma-Aldrich;

MRB: MRBiotech.

**Appendix Table 4. Oligos used in this study**

| Use     | Oligos     | Sequences                 |                       |
|---------|------------|---------------------------|-----------------------|
| sgRNA   | IRF3_sg#1F | CACCGATTACCTTCACGGAAGGAAG |                       |
|         | IRF3_sg#1R | AAACCTTCCTTCCGTGAAGGTAATC |                       |
|         | IRF3_sg#2F | CACCGTCTCCGGACACCAATGGTGG |                       |
|         | IRF3_sg#2R | AAACCCACCATTGGTGTCCGGAGAC |                       |
|         | IRF3_sg#3F | CACCGCAACCCTTCTTTGCGGTTG  |                       |
|         | IRF3_sg#3R | AAACCAACCGCAAAGAAGGGTTGC  |                       |
|         | IRF7_sg#1F | CACCGCTGAGCGCGTACACCTTGTG |                       |
|         | IRF7_sg#1R | AAACCACAAGGTGTACGCGCTCAGC |                       |
|         | IRF7_sg#2F | CACCGTGCCCCAGCTGGTGACAAGG |                       |
|         | IRF7_sg#2R | AAACCCTTGTCACCAGCTGGGGCAC |                       |
|         | IRF7_sg#3F | CACCGCCGCACGGTGCTGCAGAAGG |                       |
|         | IRF7_sg#3R | AAACCCTTCTGCAGCACCGTGCGGC |                       |
|         | JAK1_sg#1F | CACCGTGTGCGACAGGGAGCCCCTC |                       |
|         | JAK1_sg#1R | AAACGAGGGGCTCCCTGTCCGACAC |                       |
|         | JAK1_sg#2F | CACCGAGGGACATCTTGCATCAA   |                       |
|         | JAK1_sg#2R | AAACTTGATGACAAGATGTCCCTC  |                       |
|         | JAK1_sg#3F | CACCGTGAGCTGGCATCAAGGAGAG |                       |
|         | JAK1_sg#3R | AAACCTCTCCTTGATGCCAGCTCAC |                       |
|         | cTAZ-sg#1F | CACCGCCCAAAGGCTGGAGTACAAG |                       |
|         | cTAZ-sg#1R | AAACCTTGTACTCCAGCCTTTGGGC |                       |
|         | cTAZ-sg#2F | CACCGCTTTTAATTAACAAATCCAC |                       |
|         | cTAZ-sg#2R | AAACGTGGATTTGTTAATTAAGC   |                       |
|         | qPCR       | DDX58_F                   | TGGTTTAGGGAGGAAGAGGTG |
|         |            | DDX58_R                   | CCCAACTTCAATGGCTTCAT  |
| IRF7_F  |            | CGGCTGGAAAACCAACTTCC      |                       |
| IRF7_R  |            | GGGCTTGAGTCCAGCATGT       |                       |
| IFIH1_F |            | TTCAACCACAGTTCAGCCAA      |                       |
| IFIH1_R |            | TGCTCTTGCTGCCACATTCT      |                       |
| STAT1_F |            | CCCTTCTGGCTTTGGATTGA      |                       |
| STAT1_R |            | GTCAGGTTTCGCCTCCGTTCT     |                       |
| OAS1_F  |            | GGGTGGAGTTCGATGTGCTG      |                       |
| OAS1_R  |            | AGTGCTTGACTAGGCGGATG      |                       |
| MX1_R   |            | CAGAGGCAGGAGACAATCAG      |                       |
| MX1_F   |            | TTCAGGTGGAACACGAGGTT      |                       |
| IRF9_F  |            | GAAGACTCGCCTGCGCTGTG      |                       |
| IRF9_R  |            | TGTGCTGTCGCTTTGATGGT      |                       |
| VSV_1F  |            | ACGGCGTACTTCCAGATGG       |                       |
| VSV_1R  |            | CTCGGTCAAGATCCAGGT        |                       |
| cTAZ_F  |            | AAGGCTCCCTCTTGTACTCC      |                       |
| cTAZ_R  |            | CATCTGCTGCTGGTGTGGT       |                       |

|       |         |                                                                |
|-------|---------|----------------------------------------------------------------|
|       | TAZ_F   | GCTGGGAGATGACCTTCACG                                           |
|       | TAZ_R   | CTGCTGGCTCAGGGTACTGG                                           |
| ChIP  | TAZ_F   | CCCCAAGTCCGTGGTAAACT                                           |
|       | TAZ_R   | TGGGTAAGAGGAGACGGGTG                                           |
|       | GAPDH_F | GATGCCAGGAGCCAGGAGATG                                          |
|       | GAPDH_R | TCAGGCAAAGGCCTAGGAGGG                                          |
|       | ISG15_F | CCGCTCACTCTGGGGCATG                                            |
|       | ISG15_R | GCTTCGGCAGGCAGCACCG                                            |
|       | CTAZ_F  | ATCTGGAAAGTACAAAGCAGTT                                         |
|       | CTAZ_R  | ACCTGCCTATATATGTGTATTGT                                        |
| shRNA | YAP1_F  | CCGGGCCACCAAGCTAGATAAAGAACTC<br>GAGTTCTTTATCTAGCTTGGTGGCTTTTTG |
|       | TAZ_F   | CCGGGCGTTCTTGTGACAGATTATACTCG<br>AGTATAATCTGTCACAAGAACGCTTTTTG |
