# Supplementary material
Source: PubMed Central journal article supplement (PMC6549033)

Figure 1B

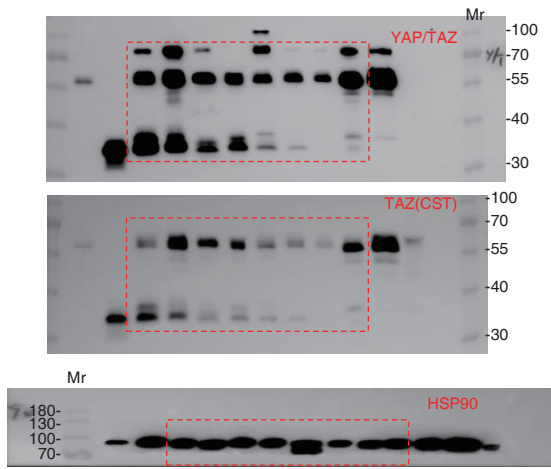

Figure 1D

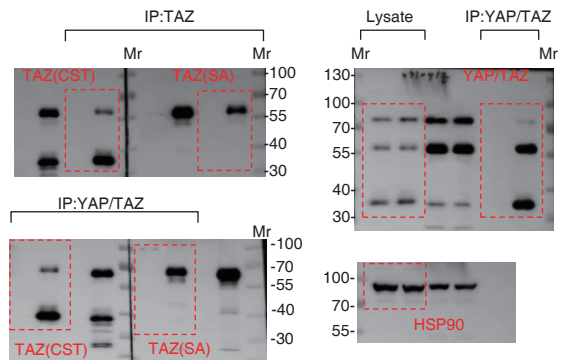

Figure 1C

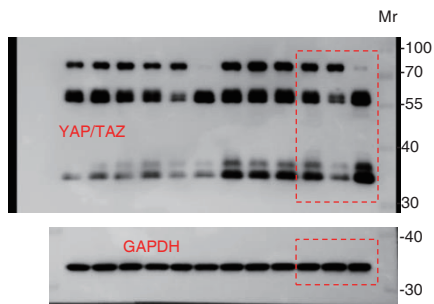

Figure 1I

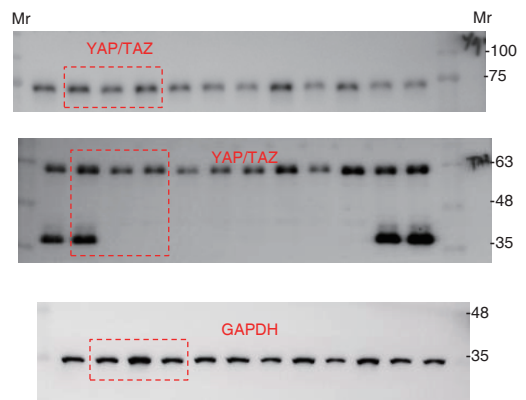

Figure 1E

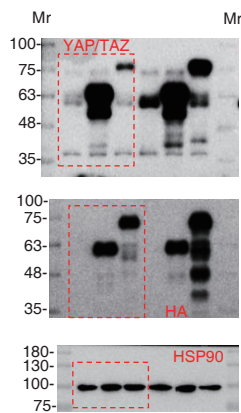

Supplement: EMBR-20-e47227-s005.pdf [file EMBR-20-e47227-s005.pdf]

**Figure 2D**

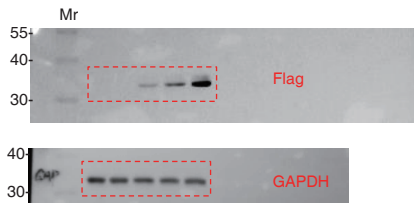

Supplement: EMBR-20-e47227-s006.pdf [file EMBR-20-e47227-s006.pdf]

**Figure 3A**

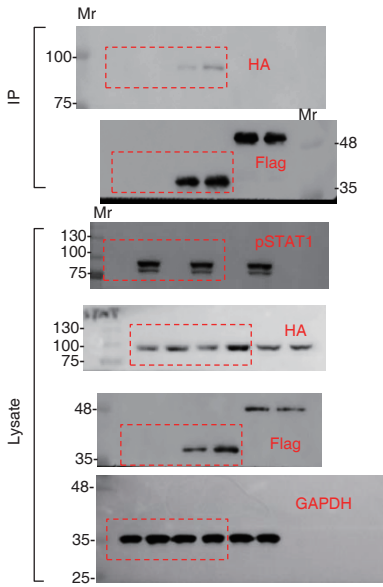

**Figure 3C**

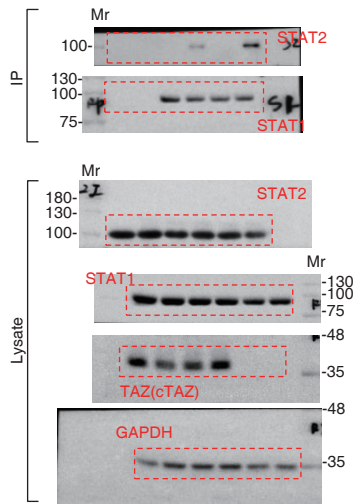

**Figure 3D**

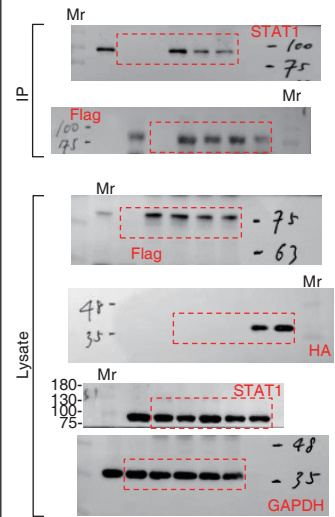

**Figure 3B**

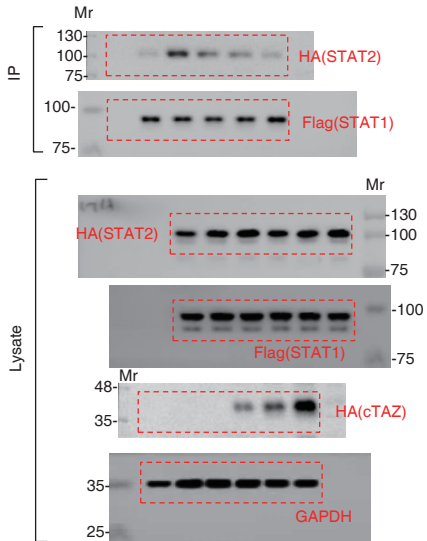

**Figure 3F**

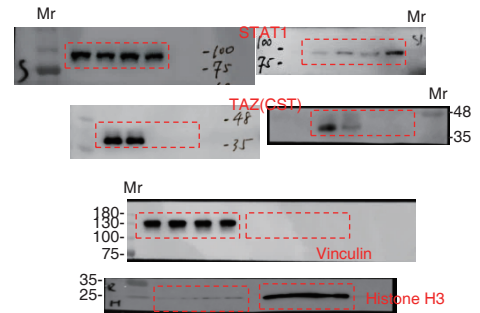

Supplement: EMBR-20-e47227-s007.pdf [file EMBR-20-e47227-s007.pdf]

**Figure 4B**

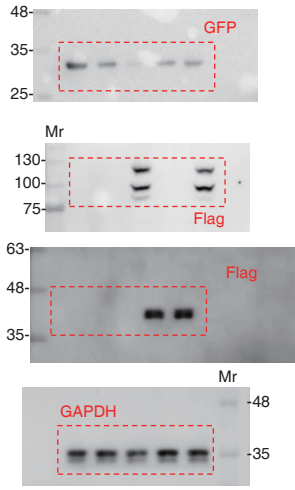

**Figure 4C**

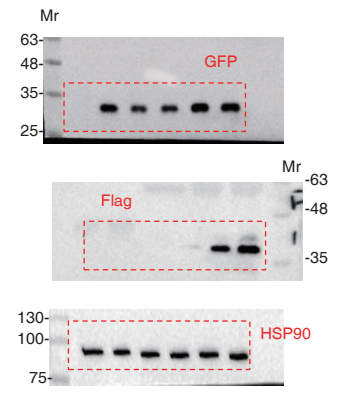

Supplement: EMBR-20-e47227-s008.pdf [file EMBR-20-e47227-s008.pdf]

**Figure 5A**

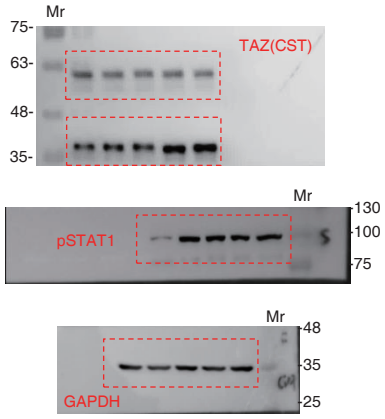

**Figure 5B**

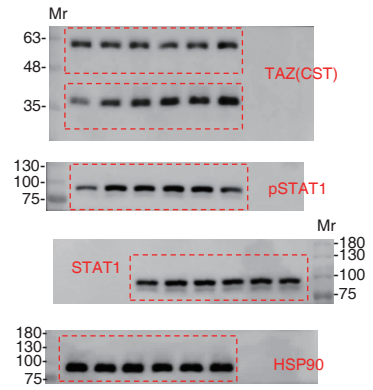

**Figure 5D**

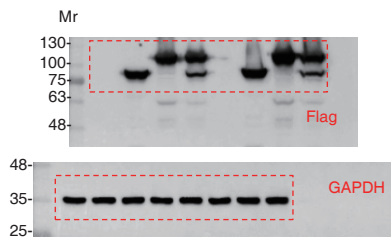

Supplement: EMBR-20-e47227-s009.pdf [file EMBR-20-e47227-s009.pdf]
